# Supplementary material for: Transformed Canine and Murine Mesenchymal Stem Cells as a Model for Sarcoma with Complex Genomics
Source: MDPI journal article supplement (doi:10.3390/cancers13051126), 2021-03-05
Supplement: s1 [file s1]

A

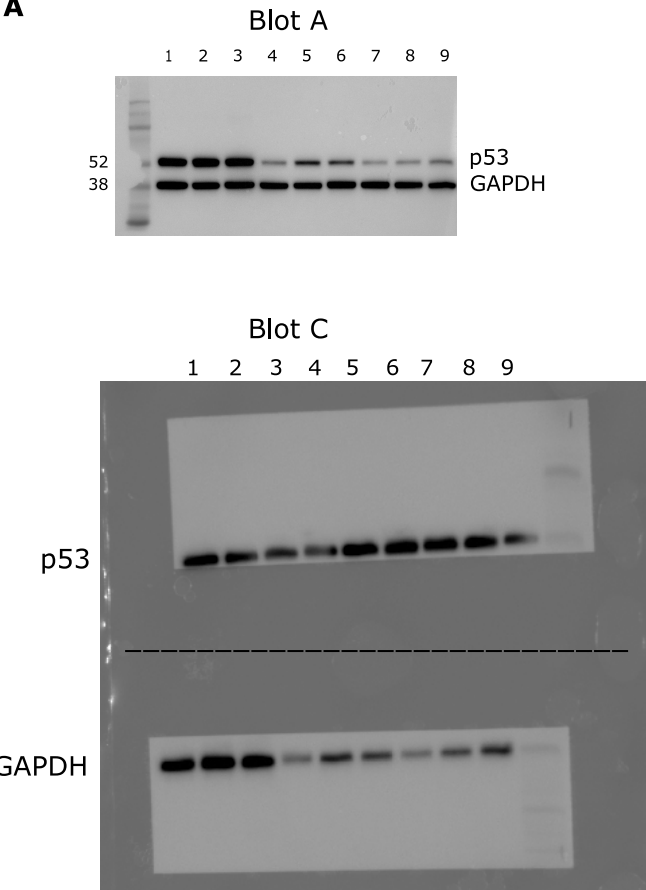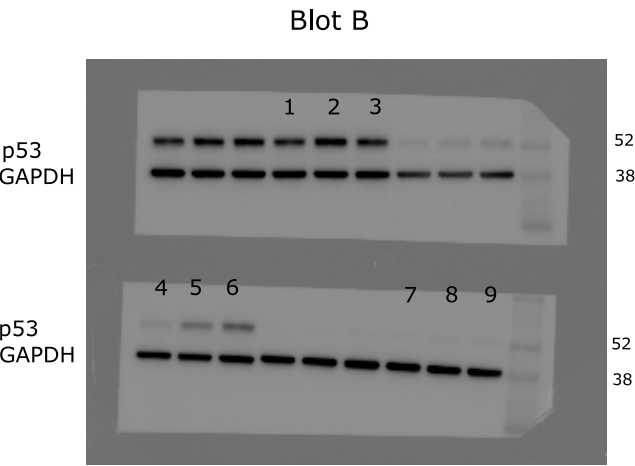

| Blot A |                   |          |          | Blot B   |         | Blot C   |          |
|--------|-------------------|----------|----------|----------|---------|----------|----------|
| Nr     | Sample            | GAPDH    | p53      | GAPDH    | p53     | GAPDH    | p53      |
| 1      | B6_4 (PBS)        | 12750650 | 12298440 | 14035600 | 8781840 | 9188398  | 5958020  |
| 2      | B6_4 (3 μM cis)   | 8859107  | 12840084 | 13275040 | 9549203 | 8679460  | 8271690  |
| 3      | B6_4 (10 μM cis)  | 9125079  | 10822107 | 13450720 | 9483360 | 9015134  | 6566186  |
| 4      | B6_7 (PBS)        | 7842483  | 1408968  | 11773200 | 914560  | 13323467 | 2319096  |
| 5      | B6_7 (3 μM cis)   | 7390915  | 3392187  | 11603680 | 2225840 | 12979266 | 9253517  |
| 6      | B6_7 (10 μM cis)  | 9197928  | 3311462  | 13585920 | 4592560 | 14728957 | 15362706 |
| 7      | B6_10 (PBS)       | 8568883  | 1223752  | 17410788 | 159975  | 5301401  | 337612   |
| 8      | B6_10 (3 μM cis)  | 7209816  | 912964   | 16517358 | 269649  | 5113020  | 684526   |
| 9      | B6_10 (10 μM cis) | 6212365  | 1387779  | 14276493 | 335502  | 3007659  | 967097   |

B

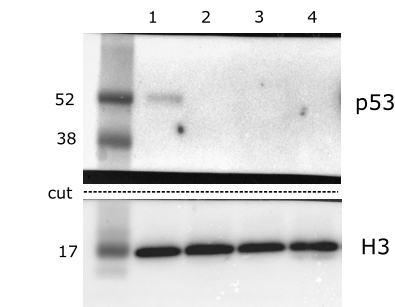

| Nr. | Sample name      | Intensity H3 | Intensity p53 |
|-----|------------------|--------------|---------------|
| 1   | P53_1 (0 μM cre) | 5544847      | 109512        |
| 2   | P53_1 (3 μM cre) | 5950791      | 936           |
| 3   | P53_1 (6 μM cre) | 4841991      | 1872          |
| 4   | P53_2 (6 μM cre) | 5213978      | 1368          |
