# Supplementary material for: Transformed Canine and Murine Mesenchymal Stem Cells as a Model for Sarcoma with Complex Genomics
Source: MDPI journal article supplement (doi:10.3390/cancers13051126), 2021-03-05
Supplement: s1 [file s1]

| GENE                  | SPECIES | FORWARD PRIMER         | REVERSE PRIMER         |
|-----------------------|---------|------------------------|------------------------|
| <i>RPL8</i>           | Canine  | CCATGAATCCTGTGGAGC     | GTAGAGGGTTTGCCGATG     |
| <i>B2MG</i>           | Canine  | TCCTCATCCTCCTCGCT      | TTCTCTGCTGGGTGTCTG     |
| <i>BGLAP</i>          | Canine  | CTGATGGTCCTTGCCCT      | CTTGGACACGAAGGTTGC     |
| <i>RUNX2</i>          | Canine  | AACGATCTGAGATTTGTGGGC  | TGTGATAGGTGGCTACTTGGG  |
| <i>SPARC</i>          | Canine  | TCTGTATGAAAGGGATGAGGAC | GCTTCTCGTTCTCGTGGA     |
| <i>SPP1</i>           | Canine  | GAATGCTGTGCTGACTGAGG   | TGGCTATCCACATCGTCTCC   |
| <i>Trp53-loxsites</i> | Murine  | CACAAAAACAGGTAAACCCA   | GAAGACAGAAAAGGGGAGGG   |
| <i>TP53-A668T</i>     | Canine  | ATAGACTACAGGCCTGCCCA   | GTCCCAGCACGTTTCCACTA   |
| <i>Trp53-exon6</i>    | Murine  | TGGTAAGCCCTCAACACCG    | ATTACAGACCTCGGGTGGCT   |
| <i>Trp53-exon4</i>    | Murine  | ACCCTTGACTCTGGTCTCGC   | ACTGACCGTCCAAGTAACAGAC |
| <i>Trp53-exon5</i>    | Murine  | CCCGACCCCTCTACTTCTCA   | TAAGAGCCATCGGGGAGGAA   |
| <i>Trp53-exon7</i>    | Murine  | CCTGGGCCTACCTTCTACCT   | TGGGACAGGAATGGATGGGA   |
| <i>Trp53-exon8</i>    | Murine  | ACGTAGGATGAGGGTGGCTA   | GTCCCTCCTTCACCTCCTCT   |
