# Supplementary figures and images for: Transformed Canine and Murine Mesenchymal Stem Cells as a Model for Sarcoma with Complex Genomics
Source: MDPI journal article supplement (doi:10.3390/cancers13051126), 2021-03-05

## Growth Curve Canine MSCs

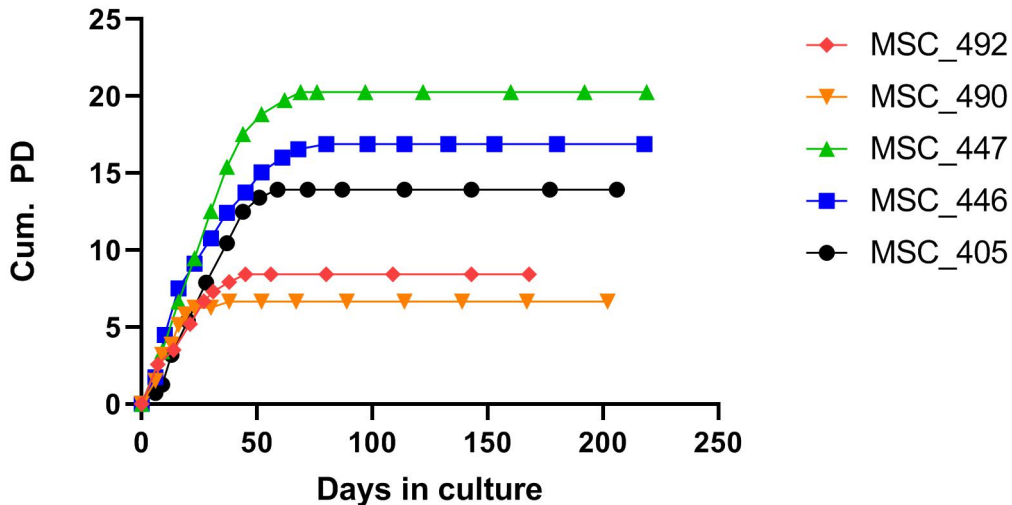

Supplement: s1 [file s1]

# OSBMSC1 tumour

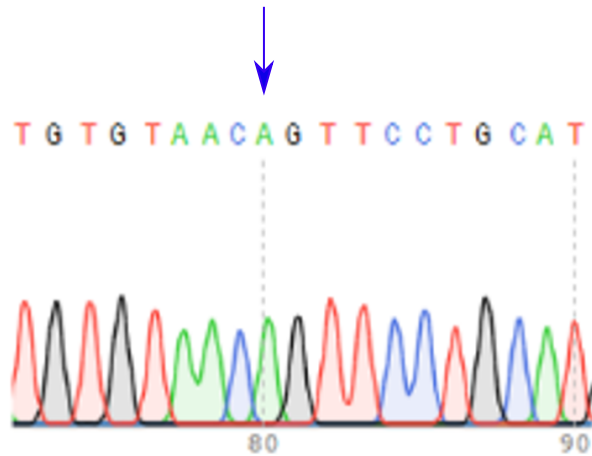

## OSBMSC1 P34

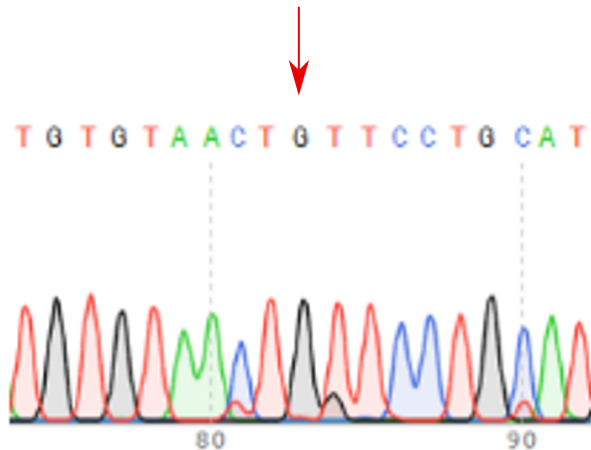

## OSBMSC1 P42

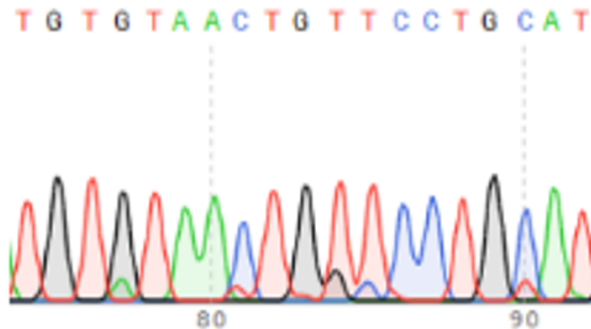

Supplement: s1 [file s1]

## Osteogenic

## Adipogenic

B6\_4

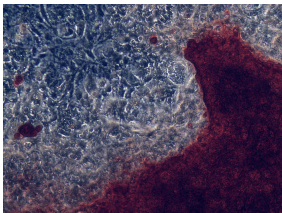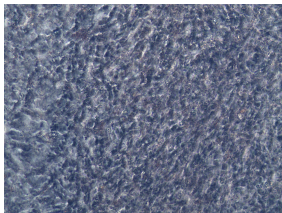

B6\_7

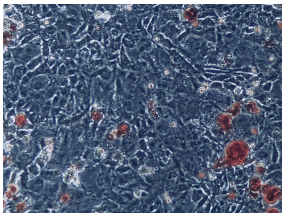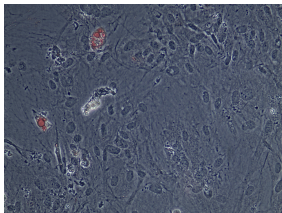

B6\_10

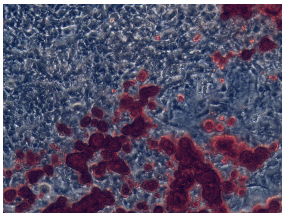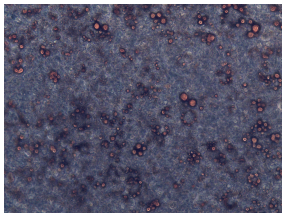

OSBMSC1

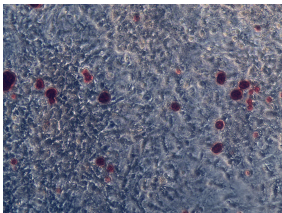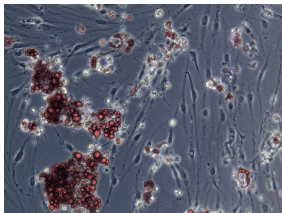

Supplement: s1 [file s1]

A B6\_4 P10

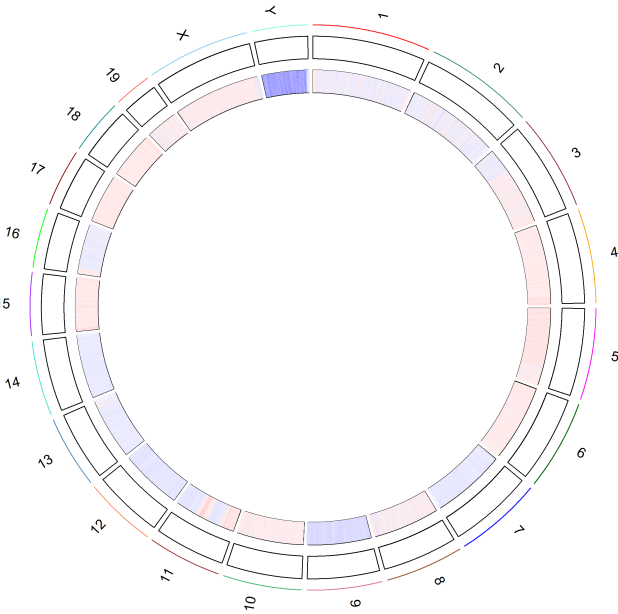

B6\_7 P15

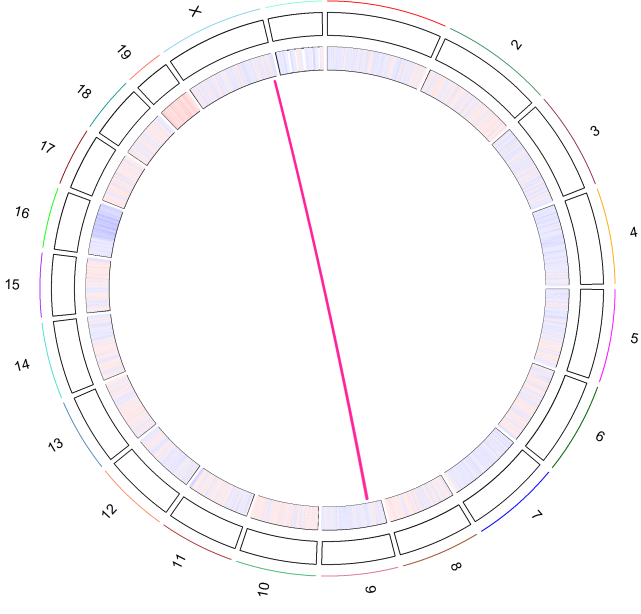

B6\_10 P13

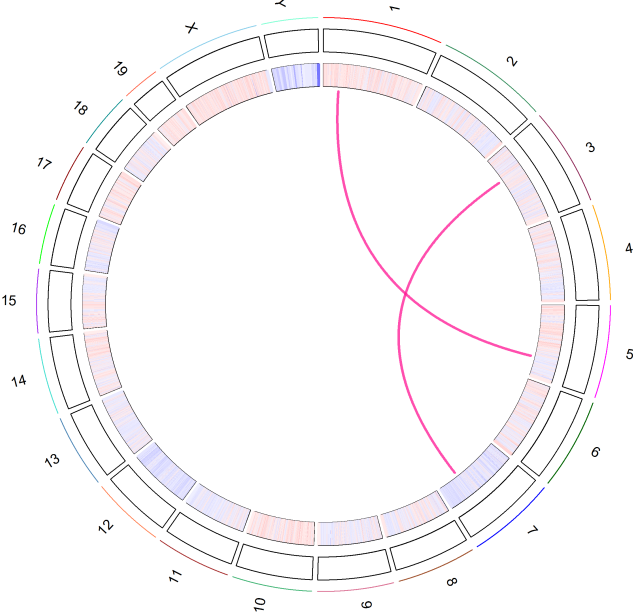

B OSBMSC1 P34

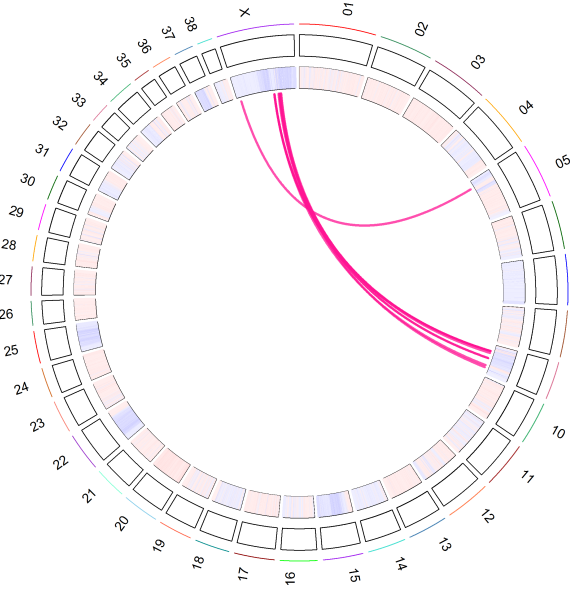

OSBMSC1 P42

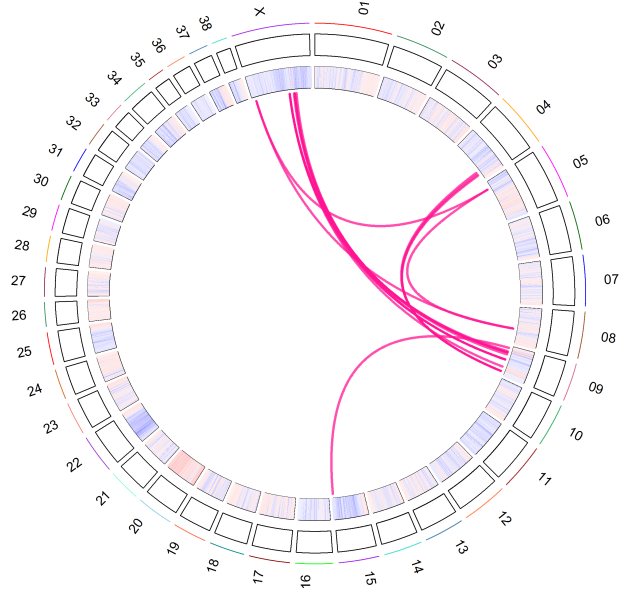

Supplement: s1 [file s1]

**A**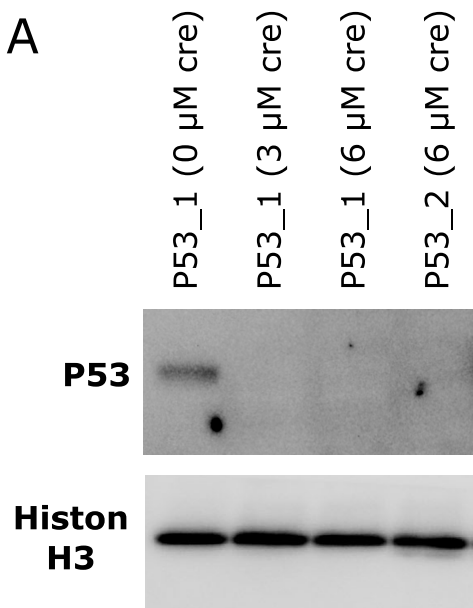**B**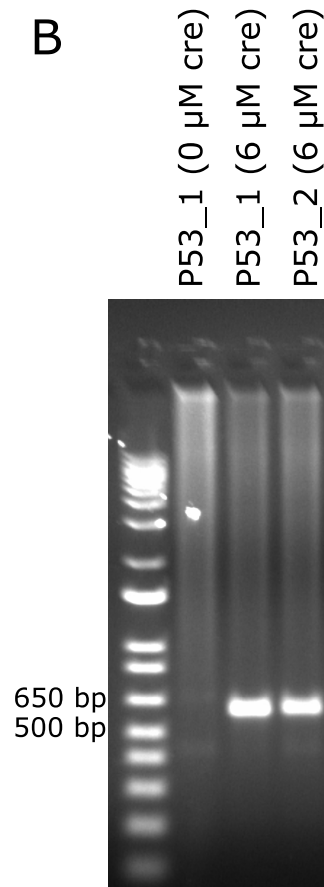**D**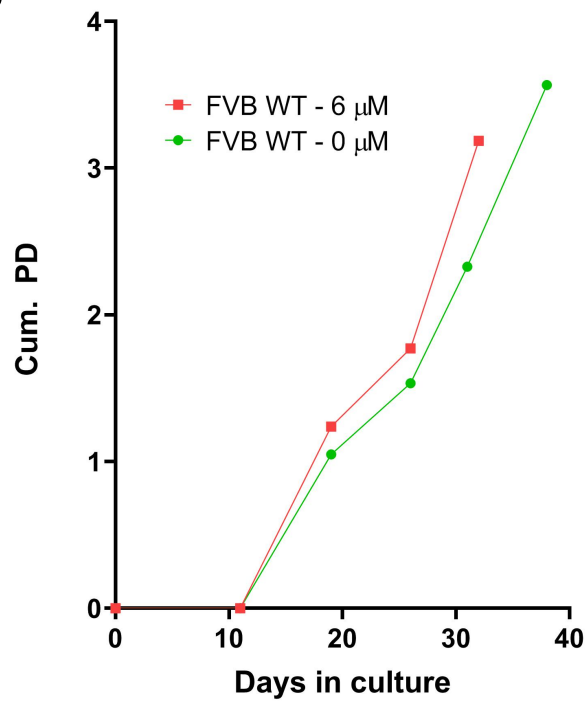**C****P53\_1 (6  $\mu$ M cre)**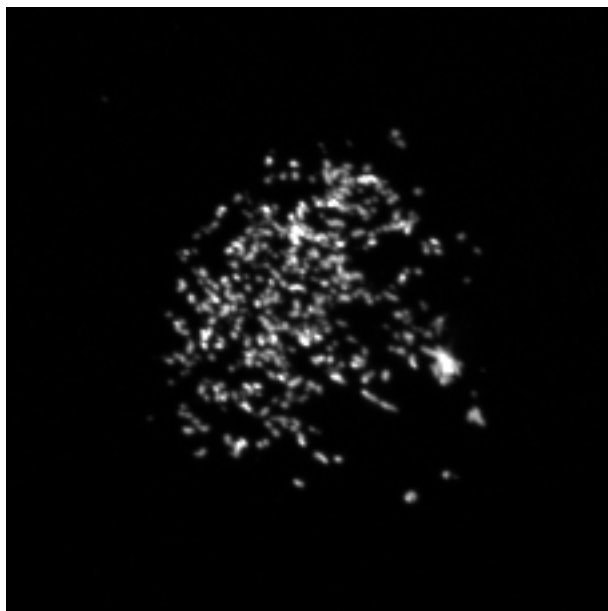**P53\_2 (6  $\mu$ M cre)**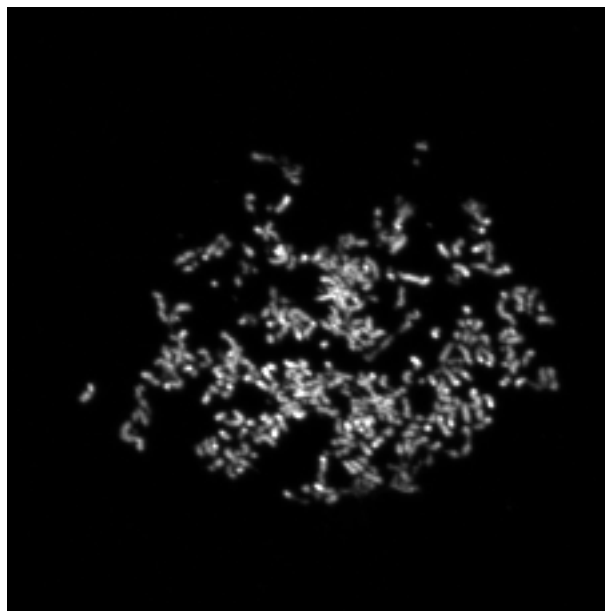

Supplement: s1 [file s1]

B6MSC4P2 Coverage

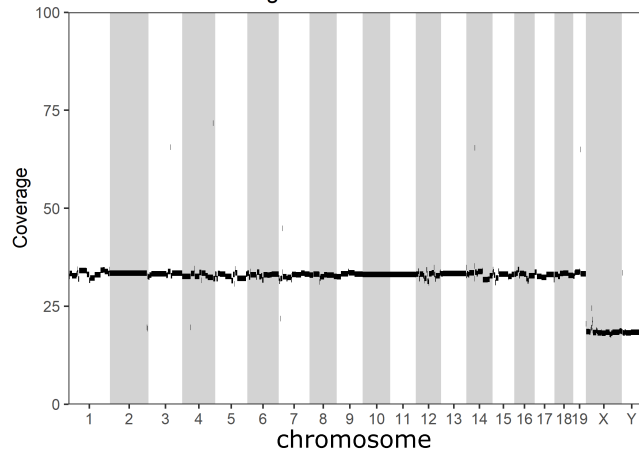

B6MSC10P3 Coverage

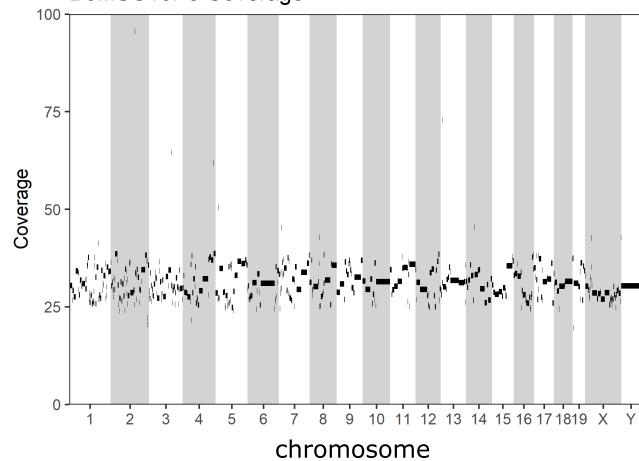

B6MSC7P2 Coverage

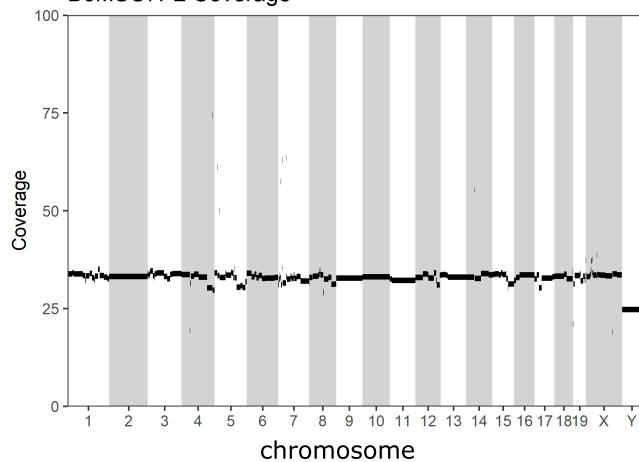

Supplement: s1 [file s1]

## Murine MSCs

---

**B6\_4**

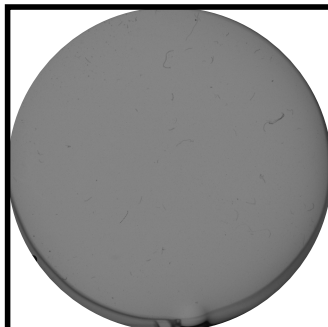

**B6\_7**

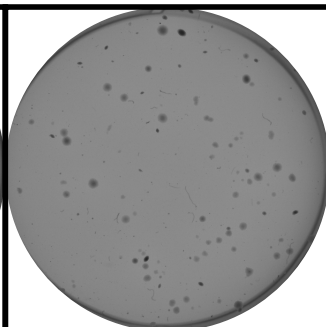

**B6\_10**

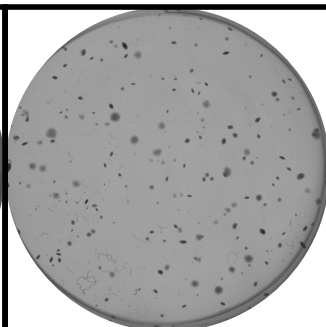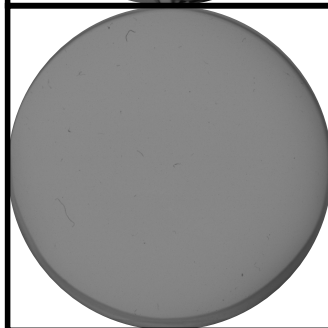

**NMRI\_2**

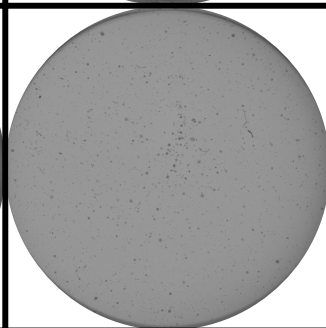

**NMRI\_3**

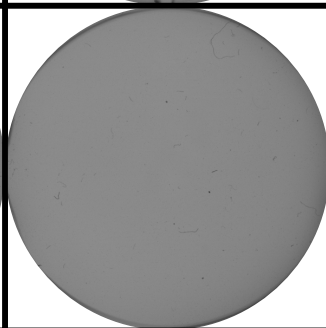

**NMRI\_9**

## Canine MSCs

---

**OSBMSC1**

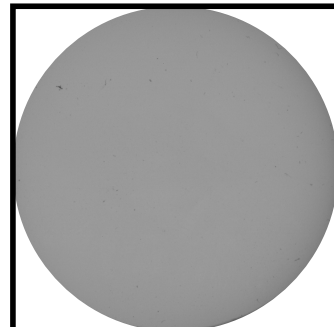

Supplement: s1 [file s1]

### B6\_4

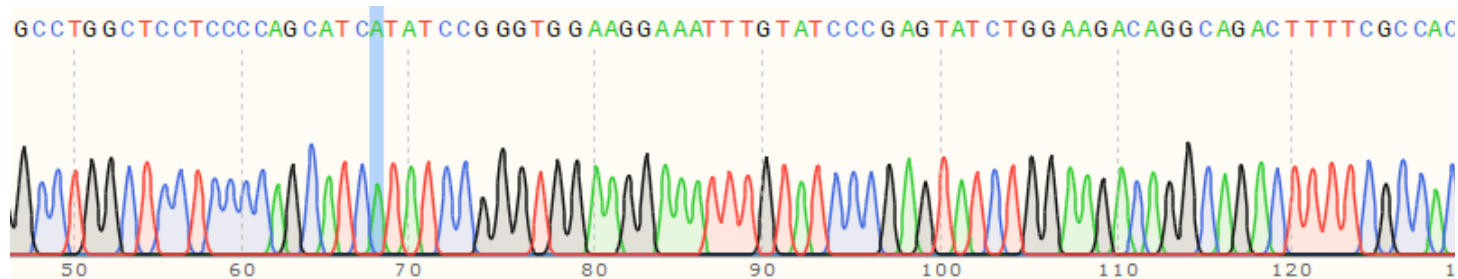

### B6\_7

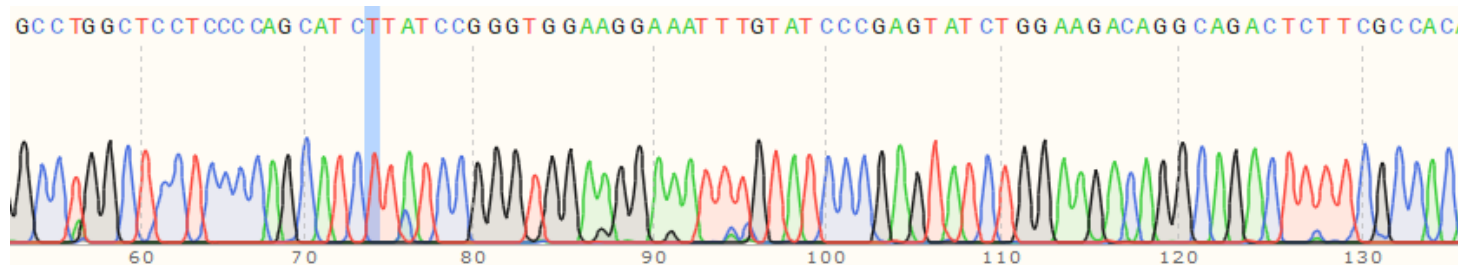

### B6\_10

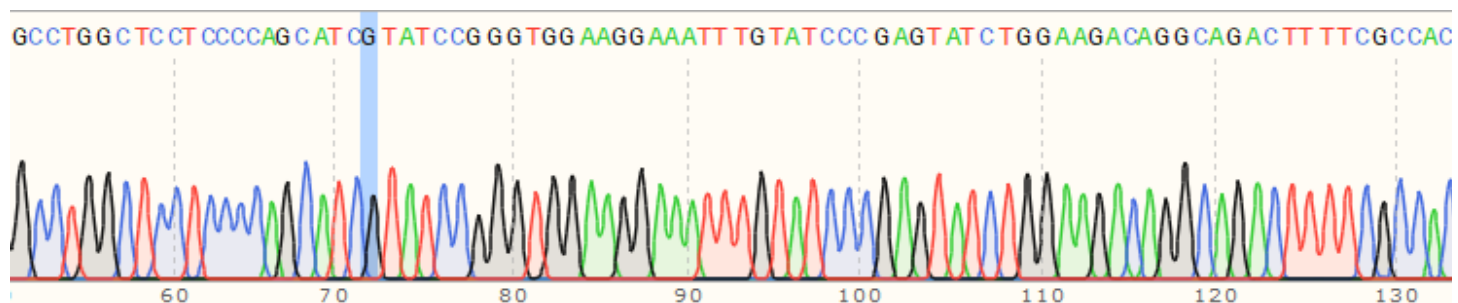

Supplement: s1 [file s1]
